# Supplementary material
Source: publisher site journal article supplement (https://www.dovepress.com/article/405814)
Supplement: Supplementary file 1 [file get_supplementary_file.php]

Appendix 1: Search Strategies for Databases

**MEDLINE**

Database: Ovid MEDLINE: Epub Ahead of Print, In-Process & Other Non-Indexed Citations, Ovid MEDLINE® Daily and Ovid MEDLINE® <1946-Present>

Search Strategy:

--------------------------------------------------------------------------------

1 Obesity/ (178233)

2 Pediatric Obesity/ (8217)

3 obes*.mp. (350970)

4 over weight*.mp. (523)

5 overweight*.mp. (73117)

6 Overweight/ (24344)

7 Body Mass Index/ (125023)

8 BMI.mp. (142187)

9 body mass.mp. (263860)

10 body fat distribution/ (2354)

11 adiposity/ (12089)

12 body weight/ (188174)

13 waist circumference/ (10171)

14 waist-height ratio/ (469)

15 skinfold thickness/ (6070)

16 waist-hip ratio/ (4062)

17 body fat.mp. (32980)

18 adipos*.mp. (153885)

19 skinfold*.mp. (11795)

20 skin fold*.mp. (2425)

21 (waist adj3 (ratio* or circumference*)).mp. (38019)

22 body weight*.mp. (349737)

23 or/1-22 (923877)

24 exp Diabetes Mellitus, Type 2/ (130941)

25 type 2 diabet*.mp. (132204)

26 T2DM.mp. (20199)

27 T2D.mp. (9665)

28 NIDDM.mp. (6946)

29 non-insulin dependent diabet*.mp. (10032)

30 ((adult onset or matur* onset) adj3 diabet*).mp. (2876)

31 Glucose Intolerance/ (8580)

32 (glucose adj3 (toleran* or intoleran*)).mp. (66992)

33 or/24-32 (235232)

34 23 or 33 (1072419)

35 adolescent/ (2008143)

36 child/ (1672638)

37 child, preschool/ (909734)

38 child*.mp. (2415271)

39 adolescen*.mp. (2083067)

40 youth*.mp. (79908)

41 teen*.mp. (30478)

42 preteen*.mp. (317)

43 pre-teen*.mp. (164)

44 preadolescen*.mp. (3170)

45 p?ediatric*.mp. (397715)

46 or/35-45 (3579240)

47 early medical intervention/ (2922)

48 intervention*.mp. (1020998)

49 preventive health services/ (13329)

50 "early intervention (education)"/ (2991)

51 Early Medical Intervention/ (2922)

52 health education/ (60175)

53 school health services/ (17082)

54 Diet/ (157818)

55 Diet, Diabetic/ (4916)

56 Diet Therapy/ (10501)

57 diet*.mp. (745215)

58 Exercise/ (107598)

59 exercise therapy/ (39921)

60 educat*.mp. (1018950)

61 exercis*.mp. (378555)

62 school.mp. (234395)

63 Public Health/ (80136)

64 public health.mp. (317735)

65 community based.mp. (61495)

66 Health Behavior/ (49325)

67 Health Promotion/ (72931)

68 behav*.mp. (1690933)

69 exp sports/ (180840)

70 sport* program.mp. (125)

71 sports.mp. (81696)

72 (physical* adj2 (fit or fitness or activ*)).mp. (142244)

73 la crosse.mp. (657)

74 lacrosse.mp. (433)

75 hockey.mp. (3003)

76 run*.mp. (196167)

77 basketball*.mp. (4357)

78 soccer.mp. (11135)

79 baseball.mp. (3769)

80 canoe*.mp. (463)

81 kayak*.mp. (443)

82 danc*.mp. (7988)

83 activity.mp. (2789802)

84 active.mp. (1024550)

85 country food*.mp. (89)

86 traditional food*.mp. (1327)

87 exp Life Style/ (92088)

88 life style*.mp. (64975)

89 lifestyle*.mp. (99270)

90 Medicine, Traditional/ (10953)

91 (traditional adj2 (medicine* or knowledge or practice* or game*)).mp. (60906)

92 medicine wheel*.mp. (36)

93 Ceremonial Behavior/ (1736)

94 ceremon*.mp. (3275)

95 (song or songs or sing or singing).mp. (10575)

96 Singing/ (861)

97 Religion/ (14281)

98 prayer*.mp. (2270)

99 spirituality/ (7360)

100 Culture/ (32761)

101 (culture or cultural).mp. (928108)

102 (wellbeing or well being).mp. (89444)

103 community participat*.mp. (19609)

104 nutrition*.mp. (381510)

105 primary prevention/ (18287)

106 prevent*.mp. (2344131)

107 Motor Activity/ (96193)

108 "Play and Playthings"/ (8718)

109 ((play or plaything* or toys or toy) adj3 child*).mp. (3262)

110 or/47-109 (9936317)

111 (eskimo* or esquimaux).mp. (1555)

112 Indians, North American/ (14329)

113 Inuits/ (3911)

114 First Nations.mp. (1359)

115 (native* adj2 Canad*).mp. (241)

116 (inuk* or inuit*).mp. (4654)

117 metis.mp. (364)

118 or/111-117 (18849)

119 health services, Indigenous/ (3234)

120 aboriginal*.mp. (8878)

121 indigenous.mp. (33477)

122 first people*.mp. (403)

123 indian*.mp. (99472)

124 or/119-123 (135589)

125 exp Canada/ (156647)

126 canad*.mp. (171575)

127 alberta*.mp. (12795)

128 quebec*.mp. (20148)

129 british columbia*.mp. (14384)

130 BC.mp. (28255)

131 manitoba*.mp. (5105)

132 new brunswick*.mp. (1497)

133 newfoundland*.mp. (2331)

134 labrador*.mp. (3528)

135 nova scotia*.mp. (3701)

136 nunavut*.mp. (623)

137 ontario*.mp. (42197)

138 prince edward island*.mp. (623)

139 PEI.mp. (7859)

140 saskatchewan*.mp. (3980)

141 yukon*.mp. (698)

142 northwest territor*.mp. (719)

143 or/125-142 (268636)

144 124 and 143 (6426)

145 118 or 144 (21597)

146 34 and 46 and 110 and 145 (827)

147 remove duplicates from 146 (827)

148 limit 147 to yr="2017 -Current" (99)

**EMBASE**

Database: Embase <1974 to 2020 Week 18>

Search Strategy:

--------------------------------------------------------------------------------

1 Obesity/ (416309)

2 adolescent obesity/ (2395)

3 childhood obesity/ (14238)

4 obes*.mp. (568599)

5 over weight*.mp. (1225)

6 overweight*.mp. (104608)

7 body mass/ (429050)

8 body mass*.mp. (490981)

9 BMI.mp. (302713)

10 body fat/ (39723)

11 adipose tissue/ (75181)

12 body fat distribution/ (7090)

13 body fat.mp. (60111)

14 adipos*.mp. (174769)

15 body weight/ (286744)

16 body weight*.mp. (490398)

17 adipos*.mp. (174769)

18 waist circumference/ (52679)

19 waist to height ratio/ (2733)

20 skinfold thickness/ (12986)

21 waist hip ratio/ (14270)

22 skinfold*.mp. (22639)

23 skin fold*.mp. (3627)

24 (waist adj3 (ratio* or circumference*)).mp. (72256)

25 or/1-24 (1396777)

26 non insulin dependent diabetes mellitus/ (251342)

27 type 2 diabet*.mp. (203871)

28 T2DM.mp. (36366)

29 T2D.mp. (18762)

30 NIDDM.mp. (8247)

31 non-insulin dependent diabet*.mp. (253868)

32 ((adult onset or matur* onset) adj3 diabet*).mp. (4370)

33 glucose intolerance/ (18191)

34 (glucose adj3 (toleran* or intoleran*)).mp. (115465)

35 or/26-34 (380778)

36 25 or 35 (1617563)

37 adolescent/ (1499727)

38 adolescen*.mp. (1597981)

39 child/ (1686006)

40 preschool child/ (538480)

41 child*.mp. (2633884)

42 youth*.mp. (92007)

43 teen*.mp. (41412)

44 preteen*.mp. (387)

45 pre-teen*.mp. (234)

46 preadolescen*.mp. (3711)

47 p?ediatric*.mp. (618030)

48 or/37-47 (3505381)

49 early intervention/ (24531)

50 intervention*.mp. (1428573)

51 preventive health services/ (27020)

52 education/ (404071)

53 health education/ or diabetes education/ or parenting education/ or school health education/ (99405)

54 educat*.mp. (1298634)

55 diet/ (214211)

56 diet therapy/ (52342)

57 diabetic diet/ (4197)

58 diet*.mp. (964591)

59 exercise/ (272236)

60 kinesiotherapy/ (30971)

61 exercis*.mp. (518421)

62 school.mp. (670260)

63 public health/ (173086)

64 public health.mp. (428962)

65 community based.mp. (75993)

66 health behavior/ (65394)

67 exp health promotion/ (98364)

68 behav*.mp. (1994048)

69 exp sports/ (161362)

70 sport* program.mp. (188)

71 sports.mp. (79119)

72 (physical* adj2 (fit or fitness or activ*)).mp. (224740)

73 la crosse.mp. (746)

74 lacrosse.mp. (611)

75 hockey.mp. (3724)

76 run*.mp. (274763)

77 basketball*.mp. (5774)

78 soccer.mp. (10658)

79 baseball.mp. (4292)

80 canoe*.mp. (585)

81 kayak*.mp. (3596)

82 danc*.mp. (10509)

83 activity.mp. (4075136)

84 active.mp. (1250175)

85 country food*.mp. (93)

86 traditional food*.mp. (1704)

87 exp lifestyle/ (128034)

88 life style*.mp. (19384)

89 lifestyle*.mp. (210435)

90 traditional medicine/ (27526)

91 (traditional adj2 (medicine* or knowledge or practice* or game*)).mp. (76126)

92 medicine wheel*.mp. (44)

93 ceremony/ (490)

94 (song or songs or sing or singing).mp. (12932)

95 Singing/ (3425)

96 Religion/ (66615)

97 prayer*.mp. (2763)

98 spirituality.mp. (9079)

99 (culture or cultural).mp. (1536760)

100 (wellbeing or well being).mp. (142579)

101 community participat*.mp. (5713)

102 nutrition*.mp. (492577)

103 primary prevention/ (39997)

104 prevent*.mp. (2748305)

105 Motor Activity/ (44118)

106 ((play or plaything* or toys or toy) adj3 child*).mp. (3984)

107 or/49-106 (13008517)

108 american indian/ (17577)

109 Eskimo/ or Inuit/ (2791)

110 First Nations.mp. (1720)

111 (native* adj2 Canad*).mp. (261)

112 inuk*.mp. (68)

113 inuit*.mp. (2355)

114 metis.mp. (492)

115 Metis/ (70)

116 (esquimaux or eskimo*).mp. (2904)

117 american indian*.mp. (19867)

118 or/108-117 (24775)

119 indigenous health care/ (808)

120 aboriginal*.mp. (11039)

121 indigenous.mp. (41017)

122 first people*.mp. (769)

123 indian*.mp. (127233)

124 or/119-123 (172226)

125 exp Canada/ (179220)

126 canad*.mp. (280564)

127 alberta*.mp. (12311)

128 quebec*.mp. (16956)

129 british columbia*.mp. (12116)

130 BC.mp. (46481)

131 manitoba*.mp. (4668)

132 new brunswick*.mp. (1388)

133 newfoundland*.mp. (2071)

134 labrador*.mp. (3291)

135 nova scotia*.mp. (3350)

136 nunavut*.mp. (609)

137 ontario*.mp. (39716)

138 prince edward island*.mp. (554)

139 PEI.mp. (10044)

140 yukon*.mp. (790)

141 northwest territor*.mp. (619)

142 or/125-141 (363629)

143 124 and 142 (7200)

144 143 or 118 (29091)

145 36 and 48 and 107 and 144 (1105)

146 remove duplicates from 145 (1089)

147 limit 146 to yr="2017 -Current" (204)

**Cochrane**

Search Name: Indigenous T2DM SR 06052020

Last Saved: 06/05/2020 22:39:26

Comment:

ID Search

#1 MeSH descriptor: [Obesity] this term only

#2 MeSH descriptor: [Pediatric Obesity] this term only

#3 MeSH descriptor: [Overweight] this term only

#4 MeSH descriptor: [Body Mass Index] this term only

#5 MeSH descriptor: [Body Fat Distribution] this term only

#6 MeSH descriptor: [Adiposity] this term only

#7 MeSH descriptor: [Body Weight] this term only

#8 MeSH descriptor: [Waist Circumference] this term only

#9 MeSH descriptor: [Waist-Height Ratio] this term only

#10 MeSH descriptor: [Skinfold Thickness] this term only

#11 MeSH descriptor: [Waist-Hip Ratio] this term only

#12 (overweight* or (over next weight*) or obes* or BMI or "body mass" or "body fat" or adipos* or skinfold* or (skin next fold*) or (body next weight*)):ti,ab,kw

#13 (waist near/3 (ratio* or circumference*)):ti,ab,kw

#14 {OR #1-#13}

#15 MeSH descriptor: [Diabetes Mellitus, Type 2] this term only

#16 MeSH descriptor: [Glucose Intolerance] this term only

#17 (("type 2" next diabet*) or T2DM or T2D or NIDDM or ("non-insulin dependent" next diabet*)):ti,ab,kw

#18 (("adult onset" or (matur* next onset)) near/3 diabet*):ti,ab,kw

#19 (glucose near/3 (toleran* or intoleran*)):ti,ab,kw

#20 {OR #15-#19}

#21 #14 or #20

#22 [mh ^child] or [mh ^adolescent] or [mh ^"child, preschool"]

#23 (child* or adolescen* or youth* or teen* or preteen* or pre-teen* or preadolescen* or p?ediatric*):ti,ab,kw

#24 {OR #22-#23}

#25 [mh ^"early medical intervention"] or [mh ^"preventive health services"] or [mh ^"early Intervention, educational"] or [mh ^"school health services"] or [mh ^diet] or [mh ^"diet, diabetic"] or [mh ^"diet therapy"] or [mh ^exercise] or [mh ^"exercise therapy"] or [mh ^"public health"] or [mh ^"Health Behavior"] or [mh ^"Health Promotion"] or [mh sports] or [mh "Life Style"] or [mh ^"Medicine, Traditional"] or [mh ^"Ceremonial Behavior"] or [mh ^singing] or [mh ^religion] or [mh ^culture] or [mh ^"primary prevention"] or [mh ^"Motor Activity"] or [mh ^"Play and Playthings"]

#26 (intervention* or diet* or educat* or exercis* or school or "public health" or "community based" or behav* or (sport* next program) or sports or "la crosse" or lacrosse or hockey or run* or basketball* or soccer or baseball or canoe* or kayak* or danc* or activity or active or "country food" or "traditional food" or (life next style*) or lifestyle* or (medicine next wheel*) or ceremon* or song or songs or sing or singing or prayer* or culture or cultural or wellbeing or "well being" or (community next participat*) or nutrition* or prevent*)

#27 (physical* near/2 (fit or fitness or activ*)):ti,ab,kw

#28 (traditional near/2 (medicine* or knowledge or practice* or game*)):ti,ab,kw

#29 ((play or plaything* or toys or toy) near/3 child*):ti,ab,kw

#30 {OR #25-#29}

#31 (eskimo* or esquimaux or "first nations" or inuk* or inuit* or metis):ti,ab,kw

#32 [mh ^"Indians, North American"] or [mh ^Inuits]

#33 (native* near/2 Canad*):ti,ab,kw

#34 {OR #31-#33}

#35 [mh ^"health services, Indigenous"]

#36 (aboriginal* or indigenous or (first next people*) or indian*):ti,ab,kw

#37 #35 or #36

#38 [mh Canada]

#39 (canad* or alberta* or quebec* or (british next columbia*) or BC or manitoba* or (new next brunswick*) or newfoundland* or labrador* or (nova next scotia*) or nunavut* or ontario* or ("prince edward" next island*) or PEI or saskatchewan* or yukon* or (northwest next territor*)):ti,ab,kw

#40 #38 or #39

#41 #37 and #40

#42 #34 or #41

#43 #21 and #24 and #30 and #42 with Cochrane Library publication date Between Jan 2017 and Dec 2020

**APA PsycInfo**

Database: APA PsycInfo <1806 to April Week 4 2020>

Search Strategy:

--------------------------------------------------------------------------------

1 (Obesity/ or Pediatric Obesity/ or obes*.mp. or over weight*.mp. or overweight*.mp. or Overweight/ or Body Mass Index/ or BMI.mp. or body mass.mp. or body fat distribution/ or adiposity/ or body weight/ or waist circumference/ or waist-height ratio/ or skinfold thickness/ or waist-hip ratio/ or body fat.mp. or adipos*.mp. or skinfold*.mp. or skin fold*.mp. or (waist adj3 (ratio* or circumference*)).mp. or body weight*.mp. or type 2 diabet*.mp. or T2DM.mp. or T2D.mp. or NIDDM.mp. or non-insulin dependent diabet*.mp. or ((adult onset or matur* onset) adj3 diabet*).mp. or Glucose Intolerance/ or (glucose adj3 (toleran* or intoleran*)).mp.) and (adolescent/ or child/ or child, preschool/ or child*.mp. or adolescen*.mp. or youth*.mp. or teen*.mp. or preteen*.mp. or pre-teen*.mp. or preadolescen*.mp. or p?ediatric*.mp.) and (early medical intervention/ or intervention*.mp. or preventive health services/ or "early intervention (education)"/ or Early Medical Intervention/ or health education/ or school health services/ or Diet/ or Diet, Diabetic/ or Diet Therapy/ or diet*.mp. or Exercise/ or exercise therapy/ or educat*.mp. or exercis*.mp. or school.mp. or Public Health/ or public health.mp. or community based.mp. or Health Behavior/ or Health Promotion/ or behav*.mp. or exp sports/ or sport* program.mp. or sports.mp. or (physical* adj2 (fit or fitness or activ*)).mp. or la crosse.mp. or lacrosse.mp. or hockey.mp. or run*.mp. or basketball*.mp. or soccer.mp. or baseball.mp. or canoe*.mp. or kayak*.mp. or danc*.mp. or activity.mp. or active.mp. or country food*.mp. or traditional food*.mp. or exp Lifestyle/ or life style*.mp. or lifestyle*.mp. or Medicine, Traditional/ or medicine wheel*.mp. or Ceremonial Behavior/ or ceremon*.mp. or song.mp. or songs.mp. or sing.mp. or singing.mp. or Singing/ or Religion/ or prayer*.mp. or spirituality/ or Culture/ or (culture or cultural).mp. or (wellbeing or well being).mp. or community participat*.mp. or nutrition*.mp. or primary prevention/ or prevent*.mp. or Motor Activity/ or "Play and Playthings"/) and (health services, Indigenous/ or Indians, North American.mp. or Inuits/ or First Nations.mp. or (native* adj2 Canad*).mp. or inuk*.mp. or metis.mp. or ((aboriginal* or indigenous or first people* or indian*).mp. and (exp Canada/ or canad*.mp. or alberta*.mp. or quebec*.mp. or british columbia*.mp. or BC.mp. or manitoba*.mp. or new brunswick*.mp. or newfoundland*.mp. or labrador*.mp. or nova scotia*.mp. or nunavut*.mp. or ontario*.mp. or prince edward island*.mp. or PEI.mp. or yukon*.mp. or northwest territor*.mp.))) (106)

**SportDiscus**

Database: SportDiscus (EBSCOhost Research Databases)

Search Strategy:

--------------------------------------------------------------------------------

(obes* or over weight* or overweight* or body mass* or BMI or body fat or adipos* or body weight* or adipos* or waist circumference or waist to height ratio or waist hip ratio or skinfold* or skin fold* or non insulin dependent diabet* or type 2 diabet* or T2DM or T2D or NIDDM or non-insulin dependent diabet* or ((adult onset or matur* onset) AND diabet*) or (glucose and (toleran* or intoleran*))) ) AND ( (adolescen* or child* or youth* or teen* or preteen* or pre-teen* or preadolescen* or pediatric* or paediatric*) ) AND ( (intervention* or educat* or diet* or exercis* or school or public health or community based or behav* or health promot* or sport* program* or sports or (physical* AND (fit or fitness or activ*)) or la crosse or lacrosse or hockey or run* or basketball* or soccer or baseball or canoe* or kayak* or danc* or activity or active or country food* or traditional food* or life style* or lifestyle* or (traditional and (medicine* or knowledge or practice* or game*)) or medicine wheel* or (song or songs or sing or singing) or prayer* or spirituality or (culture or cultural) or (wellbeing or well being) or community participat* or nutrition* or prevent* or ((play or plaything* or toys or toy) and child*)) ) AND ( ((american indian* or Eskimo* or Inuit* or First Nations or (native* and Canad*) or inuk* or metis or equimaux) or ((aboriginal* or indigenous or first people* or indian*) and (canad* or alberta* or british columbia* or BC or Quebec or Manitoba* or new Brunswick* or newfoundland* or Nunavut* or Labrador* or nova scotia* or Ontario* or prince Edward island* or Saskatchewan* or PEI or northwest terrritor* or Yukon*))) )

Limiters - Published Date: 20170101-20201231

Results: 19

Without limiters: 84

**Web of Science**

Database: Web of Science Core Collection

Search Strategy:

--------------------------------------------------------------------------------

| **Set** | **Results** | **Save History / Create AlertOpen Saved History** |
| --- | --- | --- |
| # 2 | **183** | TS=((obes* or over weight* or overweight* or body mass* or BMI or body fat or adipos* or body weight* or adipos* or waist circumference or waist to height ratio or waist hip ratio or skinfold* or skin fold* or non insulin dependent diabet* or type 2 diabet* or T2DM or T2D or NIDDM or non-insulin dependent diabet* or ((adult onset or matur* onset)  AND diabet*) or (glucose and (toleran* or intoleran*))))  AND TS=((adolescen* or child* or youth* or teen* or preteen* or pre-teen* or preadolescen* or pediatric* or paediatric*))  AND TS=((intervention* or educat* or diet* or exercis* or school or public health or community based or behav* or health promot* or sport* program* or sports or (physical*  AND (fit or fitness or activ*)) or la crosse or lacrosse or hockey or run* or basketball* or soccer or baseball or canoe* or kayak* or danc* or activity or active or country food* or traditional food* or life style* or lifestyle* or (traditional and (medicine* or knowledge or practice* or game*)) or medicine wheel* or (song or songs or sing or singing) or prayer* or spirituality or (culture or cultural) or (wellbeing or well being) or community participat* or nutrition* or prevent* or ((play or plaything* or toys or toy) and child*)))  AND TS=(((american indian* or Eskimo* or Inuit* or First Nations or (native* and Canad*) or inuk* or metis or equimaux) or ((aboriginal* or indigenous or first people* or indian*) and (canad* or alberta* or british columbia* or BC or Quebec or Manitoba* or new Brunswick* or newfoundland* or Nunavut* or Labrador* or nova scotia* or Ontario* or prince Edward island* or Saskatchewan* or PEI or northwest terrritor* or Yukon*))))  *Indexes=SCI-EXPANDED, SSCI, A&HCI, CPCI-S, CPCI-SSH, BKCI-S, BKCI-SSH, ESCI Timespan=2017-2020* |
| # 1 | **839** | TS=((obes* or over weight* or overweight* or body mass* or BMI or body fat or adipos* or body weight* or adipos* or waist circumference or waist to height ratio or waist hip ratio or skinfold* or skin fold* or non insulin dependent diabet* or type 2 diabet* or T2DM or T2D or NIDDM or non-insulin dependent diabet* or ((adult onset or matur* onset)  AND diabet*) or (glucose and (toleran* or intoleran*))))  AND TS=((adolescen* or child* or youth* or teen* or preteen* or pre-teen* or preadolescen* or pediatric* or paediatric*))  AND TS=((intervention* or educat* or diet* or exercis* or school or public health or community based or behav* or health promot* or sport* program* or sports or (physical*  AND (fit or fitness or activ*)) or la crosse or lacrosse or hockey or run* or basketball* or soccer or baseball or canoe* or kayak* or danc* or activity or active or country food* or traditional food* or life style* or lifestyle* or (traditional and (medicine* or knowledge or practice* or game*)) or medicine wheel* or (song or songs or sing or singing) or prayer* or spirituality or (culture or cultural) or (wellbeing or well being) or community participat* or nutrition* or prevent* or ((play or plaything* or toys or toy) and child*)))  AND TS=(((american indian* or Eskimo* or Inuit* or First Nations or (native* and Canad*) or inuk* or metis or equimaux) or ((aboriginal* or indigenous or first people* or indian*) and (canad* or alberta* or british columbia* or BC or Quebec or Manitoba* or new Brunswick* or newfoundland* or Nunavut* or Labrador* or nova scotia* or Ontario* or prince Edward island* or Saskatchewan* or PEI or northwest terrritor* or Yukon*))))  *Indexes=SCI-EXPANDED, SSCI, A&HCI, CPCI-S, CPCI-SSH, BKCI-S, BKCI-SSH, ESCI Timespan=All years* |

**CINHAL**


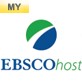


Thursday, May 07, 2020 12:22:47 AM

| **#** | **Query** | **Limiters/Expanders** | **Last Run Via** | **Results** |
| --- | --- | --- | --- | --- |
| S79 | S17 AND S20 AND S65  AND S77 | Limiters - Published Date:  20170101-20201231 Expanders - Apply equivalent subjects Search modes Boolean/Phrase | Interface - EBSCOhost  Research Databases  Search Screen - Advanced  Search  Database - CINAHL Plus with  Full Text | 78 |
| S78 | S17 AND S20 AND S65  AND S77 | Expanders - Apply equivalent subjects Search modes Boolean/Phrase | Interface - EBSCOhost  Research Databases  Search Screen - Advanced  Search  Database - CINAHL Plus with  Full Text | Display |
| S77 | S69 OR S76 | Expanders - Apply equivalent subjects Search modes Boolean/Phrase | Interface - EBSCOhost  Research Databases  Search Screen - Advanced  Search  Database - CINAHL Plus with  Full Text | Display |
| S76 | S72 AND S75 | Expanders - Apply equivalent subjects Search modes Boolean/Phrase | Interface - EBSCOhost  Research Databases  Search Screen - Advanced  Search  Database - CINAHL Plus with  Full Text | Display |
| S75 | S73 OR S74 | Expanders - Apply equivalent subjects Search modes Boolean/Phrase | Interface - EBSCOhost  Research Databases  Search Screen - Advanced  Search  Database - CINAHL Plus with  Full Text | Display |
| S74 | canad* or alberta* or quebec* or british columbia* or BC or manitba* or new brunswick* or newfoundland* or | Expanders - Apply equivalent subjects Search modes Boolean/Phrase | Interface - EBSCOhost  Research Databases  Search Screen - Advanced  Search  Database - CINAHL Plus with  Full Text | Display |

|  | labrador* or nova scotia* or nunavut* or ontario* or prince edward island* or PEI or saskatchewan* or yukon* or northwest  territor* |  |  |  |
| --- | --- | --- | --- | --- |
| S73 | (MH "Canada+") | Expanders - Apply equivalent subjects Search modes Boolean/Phrase | Interface - EBSCOhost  Research Databases  Search Screen - Advanced  Search  Database - CINAHL Plus with  Full Text | Display |
| S72 | S70 OR S71 | Expanders - Apply equivalent subjects Search modes Boolean/Phrase | Interface - EBSCOhost  Research Databases  Search Screen - Advanced  Search  Database - CINAHL Plus with  Full Text | Display |
| S71 | aboriginal* or indigenous or first people* or indian* | Expanders - Apply equivalent subjects Search modes Boolean/Phrase | Interface - EBSCOhost  Research Databases  Search Screen - Advanced  Search  Database - CINAHL Plus with  Full Text | Display |
| S70 | (MH "Health Services,  Indigenous") | Expanders - Apply equivalent subjects Search modes Boolean/Phrase | Interface - EBSCOhost  Research Databases  Search Screen - Advanced  Search  Database - CINAHL Plus with  Full Text | Display |
| S69 | S66 OR S67 OR S68 | Expanders - Apply equivalent subjects Search modes Boolean/Phrase | Interface - EBSCOhost  Research Databases  Search Screen - Advanced  Search  Database - CINAHL Plus with  Full Text | Display |
| S68 | native* N2 canad* | Expanders - Apply equivalent subjects Search modes Boolean/Phrase | Interface - EBSCOhost  Research Databases  Search Screen - Advanced  Search  Database - CINAHL Plus with  Full Text | Display |

| S67 | eskimo* or esquimaux or first nations or metis or inuit* or inuk* | Expanders - Apply equivalent subjects Search modes Boolean/Phrase | Interface - EBSCOhost  Research Databases  Search Screen - Advanced  Search  Database - CINAHL Plus with  Full Text | Display |
| --- | --- | --- | --- | --- |
| S66 | (MH "Inuit") OR (MH  "Eskimos") OR (MH  "Native Americans") | Expanders - Apply equivalent subjects Search modes Boolean/Phrase | Interface - EBSCOhost  Research Databases  Search Screen - Advanced  Search  Database - CINAHL Plus with  Full Text | Display |
| S65 | S21 OR S22 OR S23 OR  S24 OR S25 OR S26 OR  S27 OR S28 OR S29 OR  S30 OR S31 OR S32 OR  S33 OR S34 OR S35 OR  S36 OR S37 OR S38 OR  S39 OR S40 OR S41 OR  S42 OR S43 OR S44 OR  S45 OR S46 OR S47 OR  S48 OR S49 OR S50 OR  S51 OR S52 OR S53 OR  S54 OR S55 OR S56 OR  S57 OR S58 OR S59 OR  S60 OR S61 OR S62 OR  S63 OR S64 | Expanders - Apply equivalent subjects Search modes Boolean/Phrase | Interface - EBSCOhost  Research Databases  Search Screen - Advanced Search  Database - CINAHL Plus with  Full Text | Display |
| S64 | play or plaything* or toy or toys | Expanders - Apply equivalent subjects Search modes Boolean/Phrase | Interface - EBSCOhost  Research Databases  Search Screen - Advanced Search  Database - CINAHL Plus with  Full Text | Display |
| S63 | (MH "Play and  Playthings") | Expanders - Apply equivalent subjects Search modes Boolean/Phrase | Interface - EBSCOhost  Research Databases  Search Screen - Advanced  Search | Display |
| S62 | (MH "Motor Activity") |  |  |  |

| S61 | prevent* |  | Database - CINAHL Plus with  Full Text |  |
| --- | --- | --- | --- | --- |
| S60 | (MH "Preventive Health  Care") | Expanders - Apply equivalent subjects Search modes Boolean/Phrase | Interface - EBSCOhost  Research Databases  Search Screen - Advanced  Search  Database - CINAHL Plus with  Full Text | Display |
| S59 | nutrition* | Expanders - Apply equivalent subjects Search modes Boolean/Phrase | Interface - EBSCOhost  Research Databases  Search Screen - Advanced  Search  Database - CINAHL Plus with  Full Text | Display |
| S58 | (MH "Nutrition") | Expanders - Apply equivalent subjects Search modes Boolean/Phrase | Interface - EBSCOhost  Research Databases  Search Screen - Advanced  Search  Database - CINAHL Plus with  Full Text | Display |
| S57 | community participat* | Expanders - Apply equivalent subjects Search modes Boolean/Phrase | Interface - EBSCOhost  Research Databases  Search Screen - Advanced  Search  Database - CINAHL Plus with  Full Text | Display |
| S56 | wellbeing or well being | Expanders - Apply equivalent subjects Search modes Boolean/Phrase | Interface - EBSCOhost  Research Databases  Search Screen - Advanced  Search | Display |
| S55 | culture or cultural |  |  |  |

| S54 | (MH "Culture") |  | Database - CINAHL Plus with  Full Text |  |
| --- | --- | --- | --- | --- |
| S53 | prayer* | Expanders - Apply equivalent subjects Search modes Boolean/Phrase | Interface - EBSCOhost  Research Databases  Search Screen - Advanced  Search  Database - CINAHL Plus with  Full Text | Display |
| S52 | (MH "Spirituality") | Expanders - Apply equivalent subjects Search modes Boolean/Phrase | Interface - EBSCOhost  Research Databases  Search Screen - Advanced  Search  Database - CINAHL Plus with  Full Text | Display |
| S51 | (MH "Religion and  Religions") OR (MH  "Religion and Medicine")  OR (MH "Prayer") | Expanders - Apply equivalent subjects Search modes Boolean/Phrase | Interface - EBSCOhost  Research Databases  Search Screen - Advanced  Search  Database - CINAHL Plus with  Full Text | Display |
| S50 | (MH "Singing") | Expanders - Apply equivalent subjects Search modes Boolean/Phrase | Interface - EBSCOhost  Research Databases  Search Screen - Advanced  Search  Database - CINAHL Plus with  Full Text | Display |
| S49 | song or songs or sing or singing | Expanders - Apply equivalent subjects Search modes Boolean/Phrase | Interface - EBSCOhost  Research Databases  Search Screen - Advanced  Search | Display |
| S48 | ceremon* |  |  |  |

| S47 | medicine wheel* |  | Database - CINAHL Plus with  Full Text |  |
| --- | --- | --- | --- | --- |
| S46 | traditional N2 (medicine* or knowledge or practice* or game*) | Expanders - Apply equivalent subjects Search modes Boolean/Phrase | Interface - EBSCOhost  Research Databases  Search Screen - Advanced  Search  Database - CINAHL Plus with  Full Text | Display |
| S45 | (MH "Medicine,  Traditional") | Expanders - Apply equivalent subjects Search modes Boolean/Phrase | Interface - EBSCOhost  Research Databases  Search Screen - Advanced  Search  Database - CINAHL Plus with  Full Text | Display |
| S44 | lifestyle* or life style* | Expanders - Apply equivalent subjects Search modes Boolean/Phrase | Interface - EBSCOhost  Research Databases  Search Screen - Advanced  Search  Database - CINAHL Plus with  Full Text | Display |
| S43 | (MH "Life Style+") | Expanders - Apply equivalent subjects Search modes Boolean/Phrase | Interface - EBSCOhost  Research Databases  Search Screen - Advanced  Search  Database - CINAHL Plus with  Full Text | Display |
| S42 | country food* or traditional food* | Expanders - Apply equivalent subjects Search modes Boolean/Phrase | Interface - EBSCOhost  Research Databases  Search Screen - Advanced  Search | Display |
| S41 | la crosse or lacrosse or hockey or run* or basketball* or soccer or baseball or canoe* or |  |  |  |

|  | kayak* or danc* or activity or active |  |  |  |
| --- | --- | --- | --- | --- |
| S40 | physcial N2 (fit or fitness or activ*) |  | Database - CINAHL Plus with  Full Text |  |
| S39 | sport* program* or sports | Expanders - Apply equivalent subjects Search modes Boolean/Phrase | Interface - EBSCOhost  Research Databases  Search Screen - Advanced  Search  Database - CINAHL Plus with  Full Text | Display |
| S38 | (MH "Sports+") | Expanders - Apply equivalent subjects Search modes Boolean/Phrase | Interface - EBSCOhost  Research Databases  Search Screen - Advanced  Search  Database - CINAHL Plus with  Full Text | Display |
| S37 | behav* | Expanders - Apply equivalent subjects Search modes Boolean/Phrase | Interface - EBSCOhost  Research Databases  Search Screen - Advanced  Search  Database - CINAHL Plus with  Full Text | Display |
| S36 | (MH "Health Promotion") | Expanders - Apply equivalent subjects Search modes Boolean/Phrase | Interface - EBSCOhost  Research Databases  Search Screen - Advanced  Search  Database - CINAHL Plus with  Full Text | Display |
| S35 | (MH "Health Behavior") | Expanders - Apply equivalent subjects Search modes Boolean/Phrase | Interface - EBSCOhost  Research Databases  Search Screen - Advanced  Search | Display |
| S34 | community based |  |  |  |

| S33 | public health |  | Database - CINAHL Plus with  Full Text |  |
| --- | --- | --- | --- | --- |
| S32 | (MH "Public Health") | Expanders - Apply equivalent subjects Search modes Boolean/Phrase | Interface - EBSCOhost  Research Databases  Search Screen - Advanced  Search  Database - CINAHL Plus with  Full Text | Display |
| S31 | educat* or exercis* or school | Expanders - Apply equivalent subjects Search modes Boolean/Phrase | Interface - EBSCOhost  Research Databases  Search Screen - Advanced  Search  Database - CINAHL Plus with  Full Text | Display |
| S30 | (MH "Therapeutic  Exercise") | Expanders - Apply equivalent subjects Search modes Boolean/Phrase | Interface - EBSCOhost  Research Databases  Search Screen - Advanced  Search  Database - CINAHL Plus with  Full Text | Display |
| S29 | (MH "Exercise") | Expanders - Apply equivalent subjects Search modes Boolean/Phrase | Interface - EBSCOhost  Research Databases  Search Screen - Advanced  Search  Database - CINAHL Plus with  Full Text | Display |
| S28 | diet* | Expanders - Apply equivalent subjects Search modes Boolean/Phrase | Interface - EBSCOhost  Research Databases  Search Screen - Advanced  Search | Display |
| S27 | (MH "Diet Therapy") |  |  |  |

| S26 | (MH "Diabetic Diet") |  | Database - CINAHL Plus with  Full Text |  |
| --- | --- | --- | --- | --- |
| S25 | (MH "Diet") | Expanders - Apply equivalent subjects Search modes Boolean/Phrase | Interface - EBSCOhost  Research Databases  Search Screen - Advanced  Search  Database - CINAHL Plus with  Full Text | Display |
| S24 | (MH "School Health  Services") OR (MH  "School Health  Education") | Expanders - Apply equivalent subjects Search modes Boolean/Phrase | Interface - EBSCOhost  Research Databases  Search Screen - Advanced  Search  Database - CINAHL Plus with  Full Text | Display |
| S23 | (MH "Health Education") | Expanders - Apply equivalent subjects Search modes Boolean/Phrase | Interface - EBSCOhost  Research Databases  Search Screen - Advanced  Search  Database - CINAHL Plus with  Full Text | Display |
| S22 | intervention* | Expanders - Apply equivalent subjects Search modes Boolean/Phrase | Interface - EBSCOhost  Research Databases  Search Screen - Advanced  Search  Database - CINAHL Plus with  Full Text | Display |
| S21 | (MH "Early Childhood  Intervention") OR (MH  "Early Intervention") | Expanders - Apply equivalent subjects Search modes Boolean/Phrase | Interface - EBSCOhost  Research Databases  Search Screen - Advanced  Search | Display |
| S20 | S18 OR S19 |  |  |  |

| S19 | child* or adolescen* or youth* or teen* or preteen* or pre-teen* or preadolescen* or p? |  |  |  |
| --- | --- | --- | --- | --- |
|  | ediatric* |  | Database - CINAHL Plus with  Full Text |  |
| S18 | (MH "Adolescence") OR  (MH "Child") OR (MH  "Child, Preschool") | Expanders - Apply equivalent subjects Search modes Boolean/Phrase | Interface - EBSCOhost  Research Databases  Search Screen - Advanced  Search  Database - CINAHL Plus with  Full Text | Display |
| S17 | S10 OR S16 | Expanders - Apply equivalent subjects Search modes Boolean/Phrase | Interface - EBSCOhost  Research Databases  Search Screen - Advanced  Search  Database - CINAHL Plus with  Full Text | Display |
| S16 | S11 OR S12 OR S13 OR  S14 OR S15 | Expanders - Apply equivalent subjects Search modes Boolean/Phrase | Interface - EBSCOhost  Research Databases  Search Screen - Advanced  Search  Database - CINAHL Plus with  Full Text | Display |
| S15 | glucose N3 (toleran* or intoleran*) | Expanders - Apply equivalent subjects Search modes Boolean/Phrase | Interface - EBSCOhost  Research Databases  Search Screen - Advanced  Search  Database - CINAHL Plus with  Full Text | Display |
| S14 | (MH "Glucose  Intolerance") | Expanders - Apply equivalent subjects Search modes Boolean/Phrase | Interface - EBSCOhost  Research Databases  Search Screen - Advanced  Search | Display |
| S13 | (adult onset or matur* onset) N3 diabet* |  |  |  |

| S12 | type 2 diabet* or T2DM or T2D or NIDDM or noninsulin dependent  diabet* |  | Database - CINAHL Plus with  Full Text |  |
| --- | --- | --- | --- | --- |
| S11 | (MH "Diabetes Mellitus,  Type 2") | Expanders - Apply equivalent subjects Search modes Boolean/Phrase | Interface - EBSCOhost  Research Databases  Search Screen - Advanced  Search  Database - CINAHL Plus with  Full Text | Display |
| S10 | S1 OR S2 OR S3 OR S4  OR S5 OR S6 OR S7 OR  S8 OR S9 | Expanders - Apply equivalent subjects Search modes Boolean/Phrase | Interface - EBSCOhost  Research Databases  Search Screen - Advanced  Search  Database - CINAHL Plus with  Full Text | Display |
| S9 | waist N3 (ratio* or circumference*) | Expanders - Apply equivalent subjects Search modes Boolean/Phrase | Interface - EBSCOhost  Research Databases  Search Screen - Advanced  Search  Database - CINAHL Plus with  Full Text | Display |
| S8 | body fat or adipos* or skinfold* or skin fold* or body weight* | Expanders - Apply equivalent subjects Search modes Boolean/Phrase | Interface - EBSCOhost  Research Databases  Search Screen - Advanced  Search  Database - CINAHL Plus with  Full Text | Display |
| S7 | (MH "Skinfold Thickness") | Expanders - Apply equivalent subjects Search modes Boolean/Phrase | Interface - EBSCOhost  Research Databases  Search Screen - Advanced  Search | Display |
| S6 | (MH "Body Weight") OR  (MH "Waist  Circumference") OR (MH  "Waist-Hip Ratio") |  |  |  |

|  |  |  | Database - CINAHL Plus with  Full Text |  |
| --- | --- | --- | --- | --- |
| S5 | (MH "Adipose Tissue  Distribution") | Expanders - Apply equivalent subjects Search modes Boolean/Phrase | Interface - EBSCOhost  Research Databases  Search Screen - Advanced  Search  Database - CINAHL Plus with  Full Text | Display |
| S4 | BMI or body mass | Expanders - Apply equivalent subjects Search modes Boolean/Phrase | Interface - EBSCOhost  Research Databases  Search Screen - Advanced  Search  Database - CINAHL Plus with  Full Text | Display |
| S3 | (MH "Body Mass Index") | Expanders - Apply equivalent subjects Search modes Boolean/Phrase | Interface - EBSCOhost  Research Databases  Search Screen - Advanced  Search  Database - CINAHL Plus with  Full Text | Display |
| S2 | obes* or overweight* or over weight* | Expanders - Apply equivalent subjects Search modes Boolean/Phrase | Interface - EBSCOhost  Research Databases  Search Screen - Advanced  Search  Database - CINAHL Plus with  Full Text | Display |
| S1 | (MH "Obesity") OR (MH  "Pediatric Obesity") | Expanders - Apply equivalent subjects Search modes Boolean/Phrase | Interface - EBSCOhost  Research Databases  Search Screen - Advanced  Search  Database - CINAHL Plus with  Full Text | Display |

**Table S1** PRISMA checklist

| **Section/topic** | **#** | **Checklist item** | **Reported on page #** |
| --- | --- | --- | --- |
| **TITLE** | | |  |
| Title | 1 | Identify the report as a systematic review, meta-analysis, or both. | 1 |
| **ABSTRACT** | | |  |
| Structured summary | 2 | Provide a structured summary including, as applicable: background; objectives; data sources; study eligibility criteria, participants, and interventions; study appraisal and synthesis methods; results; limitations; conclusions and implications of key findings; systematic review registration number. | 3 |
| **INTRODUCTION** | | |  |
| Rationale | 3 | Describe the rationale for the review in the context of what is already known. | 5 |
| Objectives | 4 | Provide an explicit statement of questions being addressed with reference to participants, interventions, comparisons, outcomes, and study design (PICOS). | 6 |
| **METHODS** | | |  |
| Protocol and registration | 5 | Indicate if a review protocol exists, if and where it can be accessed (e.g., Web address), and, if available, provide registration information including registration number. | 6 |
| Eligibility criteria | 6 | Specify study characteristics (e.g., PICOS, length of follow-up) and report characteristics (e.g., years considered, language, publication status) used as criteria for eligibility, giving rationale. | 6,7 |
| Information sources | 7 | Describe all information sources (e.g., databases with dates of coverage, contact with study authors to identify additional studies) in the search and date last searched. | 7 |
| Search | 8 | Present full electronic search strategy for at least one database, including any limits used, such that it could be repeated. | 7 |
| Study selection | 9 | State the process for selecting studies (i.e., screening, eligibility, included in systematic review, and, if applicable, included in the meta-analysis). | 7 |
| Data collection process | 10 | Describe method of data extraction from reports (e.g., piloted forms, independently, in duplicate) and any processes for obtaining and confirming data from investigators. | 7 |
| Data items | 11 | List and define all variables for which data were sought (e.g., PICOS, funding sources) and any assumptions and simplifications made. | 6,7 |

**Table S1** PRISMA checklist (Contd.)

| **Section/topic** | **#** | **Checklist item** | **Reported on page #** |
| --- | --- | --- | --- |
| Risk of bias in individual studies | 12 | Describe methods used for assessing risk of bias of individual studies (including specification of whether this was done at the study or outcome level), and how this information is to be used in any data synthesis. | 7,8 |
| Summary measures | 13 | State the principal summary measures (e.g., risk ratio, difference in means). | 8 |
| Synthesis of results | 14 | Describe the methods of handling data and combining results of studies, if done, including measures of consistency (e.g., I2) for each meta-analysis. | 8 |
| Risk of bias across studies | 15 | Specify any assessment of risk of bias that may affect the cumulative evidence (e.g., publication bias, selective reporting within studies). | 7,8 |
| Additional analyses | 16 | Describe methods of additional analyses (e.g., sensitivity or subgroup analyses, meta-regression), if done, indicating which were pre-specified. | 8 |
| **RESULTS** | | |  |
| Study selection | 17 | Give numbers of studies screened, assessed for eligibility, and included in the review, with reasons for exclusions at each stage, ideally with a flow diagram. | 9 |
| Study characteristics | 18 | For each study, present characteristics for which data were extracted (e.g., study size, PICOS, follow-up period) and provide the citations. | 9,10 |
| Risk of bias within studies | 19 | Present data on risk of bias of each study and, if available, any outcome level assessment (see item 12). | 11 |
| Results of individual studies | 20 | For all outcomes considered (benefits or harms), present, for each study: (a) simple summary data for each intervention group (b) effect estimates and confidence intervals, ideally with a forest plot. | 9,10,11 |
| Synthesis of results | 21 | Present results of each meta-analysis done, including confidence intervals and measures of consistency. | 10,11,12 |
| Risk of bias across studies | 22 | Present results of any assessment of risk of bias across studies (see Item 15). | 11 |
| Additional analysis | 23 | Give results of additional analyses, if done (e.g., sensitivity or subgroup analyses, meta-regression [see Item 16]). | n/a |

**Table S1** PRISMA checklist (Contd.)

| **Section/topic** | **#** | **Checklist item** | **Reported on page #** |
| --- | --- | --- | --- |
| **DISCUSSION** | | |  |
| Summary of evidence | 24 | Summarize the main findings including the strength of evidence for each main outcome; consider their relevance to key groups (e.g., healthcare providers, users, and policy makers). | 12 |
| Limitations | 25 | Discuss limitations at study and outcome level (e.g., risk of bias), and at review-level (e.g., incomplete retrieval of identified research, reporting bias). | 14 |
| Conclusions | 26 | Provide a general interpretation of the results in the context of other evidence, and implications for future research. | 14,15 |
| **FUNDING** | | |  |
| Funding | 27 | Describe sources of funding for the systematic review and other support (e.g., supply of data); role of funders for the systematic review. | 2 |

**Notes:** Moher D, Liberati A, Tetzlaff J, Altman DG. Preferred reporting items for systematic reviews and meta-analyses: the PRISMA statement. *Int J Surg*. 2010;8(5):336-341.21

**Table S2** Evaluation of risk of bias for uncontrolled studies using the UAEPC checklist

| Publication (year) | Consecutive recruitment | Incomplete outcome addressed | Standardized measurement method | Independent outcome assessor | Overall risk |
| --- | --- | --- | --- | --- | --- |
| Saksvig et al. (2005)34 | Yes | Yes | Unclear | Probably no | Unclear |
| Adams et al. (2005)35 | Yes | Unclear | Yes | Yes | Low |
| Tomlin et al. (2012)36 | Yes | Yes | Yes | Probably no | Low |
| Kakekagumick et al. (2013) 37 | Yes | Unclear | Yes | Probably no | Unclear |
| Triador et al. (2015) 38 | Yes | Yes | No | No | Unclear |
| Gates et al.  (2016) 39 | Yes | Yes | No | No | Unclear |

**Table S3** Evaluation of risk of bias for non-randomized control studies using ROBINS-I

| Domain | Paradis et al. (2005)32 | Oosman (2012) 33 | Ronsley et al. (2013) 30 | Eskicioglu et al. (2014) 31 |
| --- | --- | --- | --- | --- |
| Domain 1: Bias due to confounding | Moderate | Moderate | Moderate | Moderate |
| Domain 2: Bias in selection of participants into the study | Low | Low | Low | Low |
| Domain 3: Bias in classification of interventions | Low | Low | Moderate | Moderate |
| Domain 4: Bias due to deviations from intended interventions | Moderate | Moderate | Moderate | Moderate |
| Domain 5: Bias due to missing data | Moderate | Changes in Diet: Low  Changes in Physical Activity: Moderate | Moderate/ Serious | Moderate/ Serious |
| Domain 6: Bias in measurement of outcomes | BMI z-score: Moderate  Skinfold Thickness: Moderate  Changes in Diet: Serious  Changes in Physical Activity: Serious | Moderate | BMI z-score: Moderate  WC: Moderate  Changes in Diet: Serious  Changes in Physical Activity: Serious | Moderate |
| Domain 7: Bias in selection of reported result | Low | Low | Low | Low |
| **Overall** | **Moderate/Serious** | **Moderate** | **Serious** | **Serious** |

**Table S4** Overall quality of evidence for BMI z-score and WC

| **Certainty assessment** | | | | | | **№ of patients** | | |  |  |
| --- | --- | --- | --- | --- | --- | --- | --- | --- | --- | --- |
| **№ of studies** | **Risk of bias** | **Inconsistency** | **Indirectness** | **Imprecision** | **Publication bias** | **Lifestyle intervention** | **Control** | **Results** | | **Quality** |
| BMI z-score  (2 non-RCT) | serious a | not serious | not serious | serious b | Not suspected | 169 | 161 | MD -0.10  [-0.16,-0.04] | | ⨁◯◯◯ VERY  LOW |
| WC  (2 non-RCT) | serious a | not serious | not serious | serious b | Not suspected | 169 | 161 | MD -2.10  [-3.69,-0.50] | | ⨁◯◯◯ VERY  LOW |
| Fat mass percentage | serious a | not serious | not serious | serious b | Not suspected | 165 | N/A | N/A | | ⨁◯◯◯ VERY  LOW |
| Skinfold thickness | serious a | N/Ac | not serious | not serious | Not suspected | 458 | 199 | N/A | | ⨁⨁◯◯  LOW |
| Changes in diet | serious a | serious | not serious | not serious | Not suspected | 1031 | 122 | N/A | | ⨁◯◯◯ VERY  LOW |
| Changes in physical activity | serious a | serious | not serious | not serious | Not suspected | 908 | 282 | N/A | | ⨁◯◯◯ VERY  LOW |

Abbreviations: WC, waist circumference; RCT, randomized controlled trials; MD, Mean Difference

#### Explanations

a. Bias due to confounding, deviation and classification of intervention, and lack of blinding

b. Small sample size (<200 per group)

c. Only one study reports on outcome
